# Supplementary material for: Facile synthesis of Cu-CuFe2O4nanozymes for sensitive assay of H2O2and GSH
Source: Royal Society of Chemistry journal article supplement (doi:10.1039/d0dt02395g), 2020-01-01
Supplement: d0dt02395g1.pdf [file d0dt02395g1.pdf]

## Supporting information

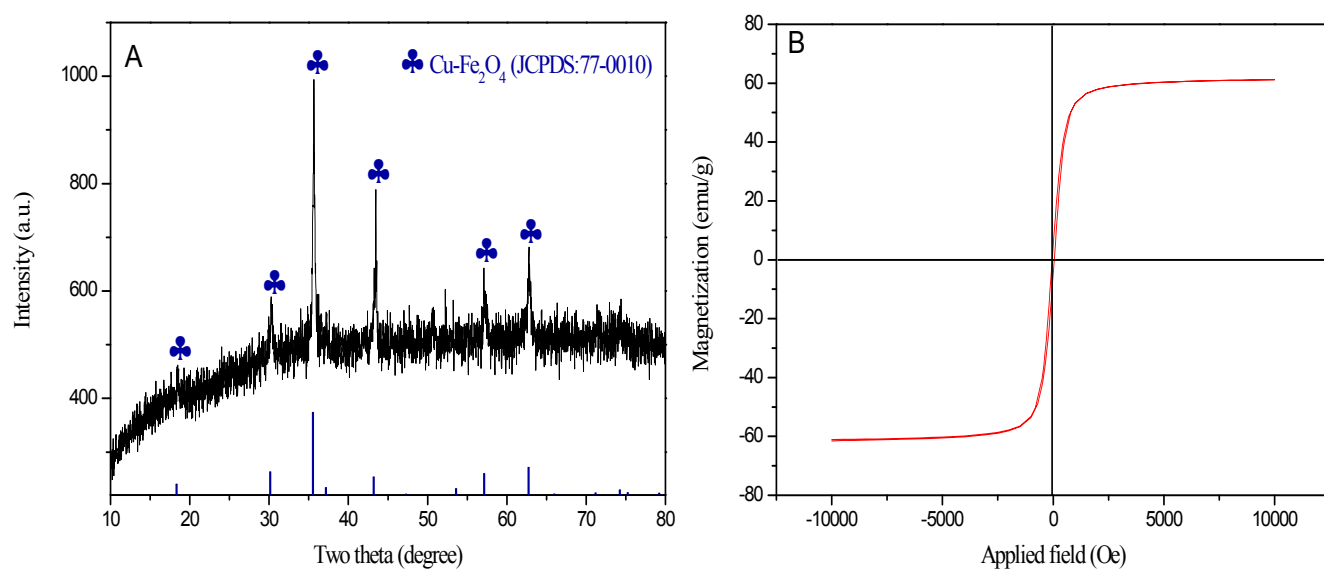

**Fig. s1.** A XRD pattern (A) and magnetization curves of CuFe<sub>2</sub>O<sub>4</sub> (B).

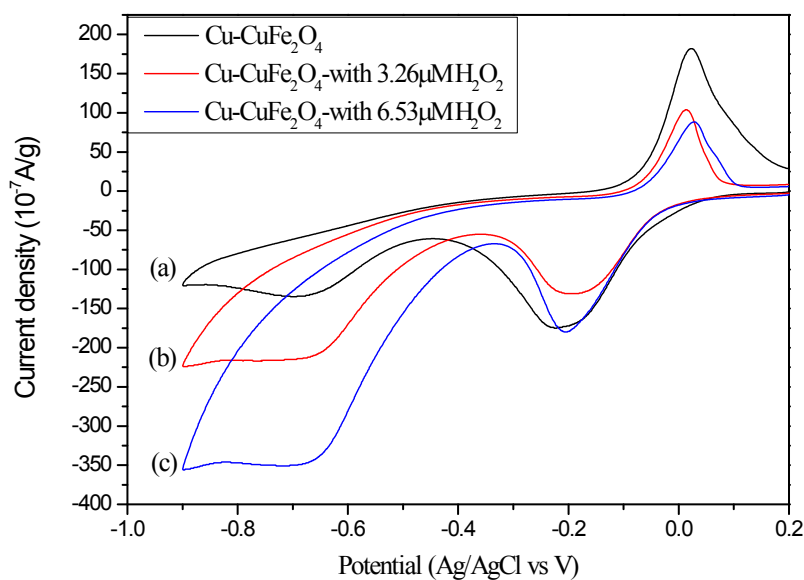

**Fig. s2.** CV curves of modified GCE with Cu-CuFe<sub>2</sub>O<sub>4</sub> in the acetate buffer solution (pH=4.0).

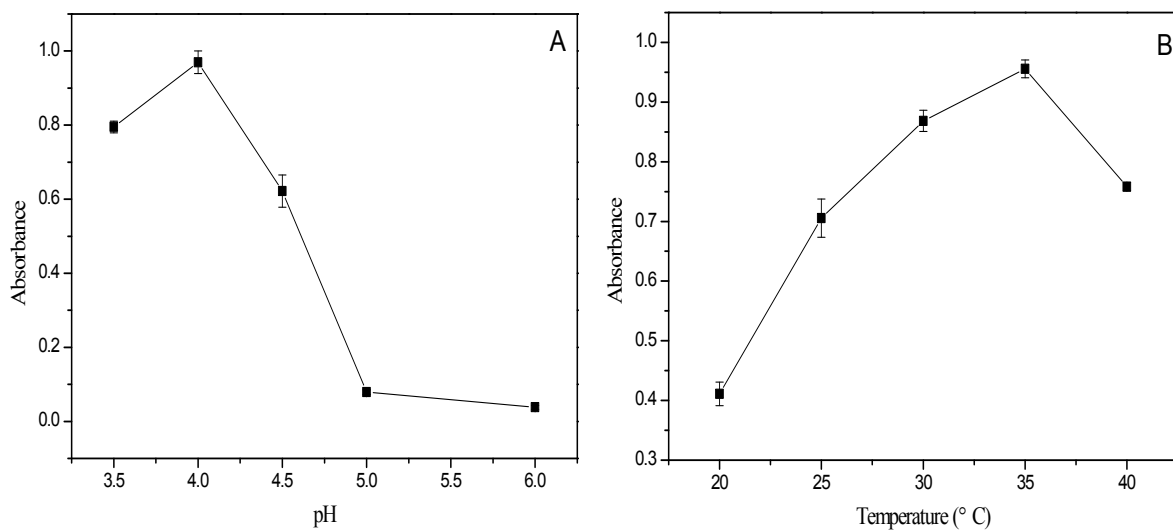

**Fig. s3.** Effects of pH value of the solution (A) and experimental temperature (B) on the peroxidase-like activity of the Cu-CuFe<sub>2</sub>O<sub>4</sub>. The experimental conditions are 200  $\mu$ L of 0.25 mg mL<sup>-1</sup> Cu-CuFe<sub>2</sub>O<sub>4</sub>, 2.5 mL of HAc-NaAc buffer solution, 250  $\mu$ L of 10 mM TMB and 50  $\mu$ L of 3.60 mM H<sub>2</sub>O<sub>2</sub>.

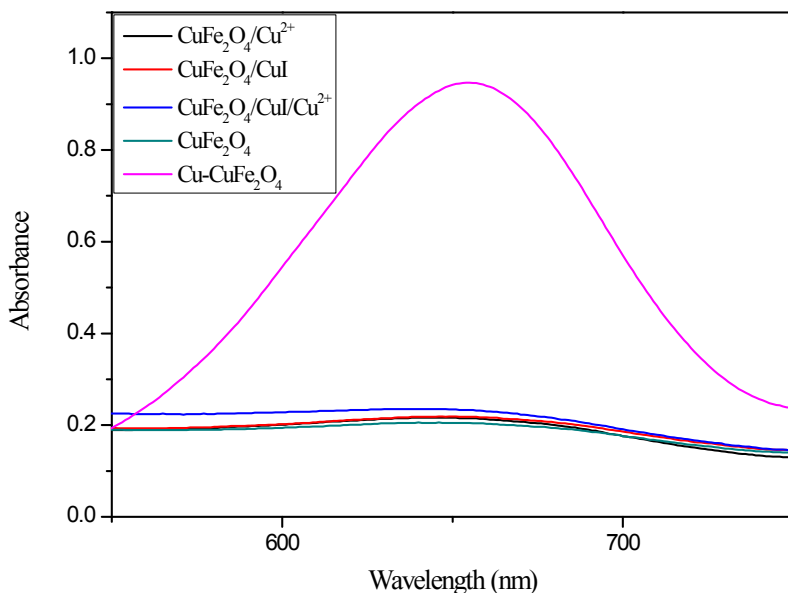

**Fig. s4.** Absorbance values of different systems. Cu<sup>2+</sup> was added through the addition of 0.1 mM Cu(NO<sub>3</sub>)<sub>2</sub>. The concentration of CuI is 0.25 mg/mL.

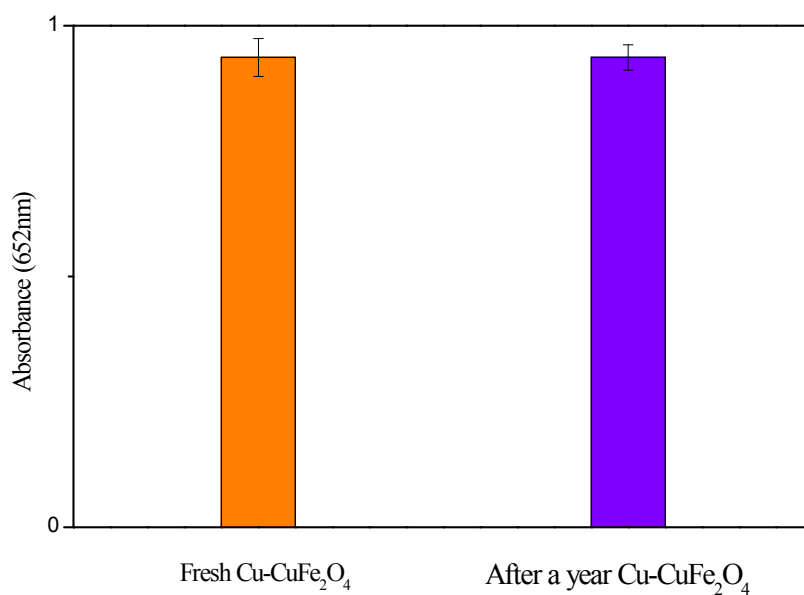

**Fig. s5.** Stability of Cu-CuFe<sub>2</sub>O<sub>4</sub> as a nanozyme.

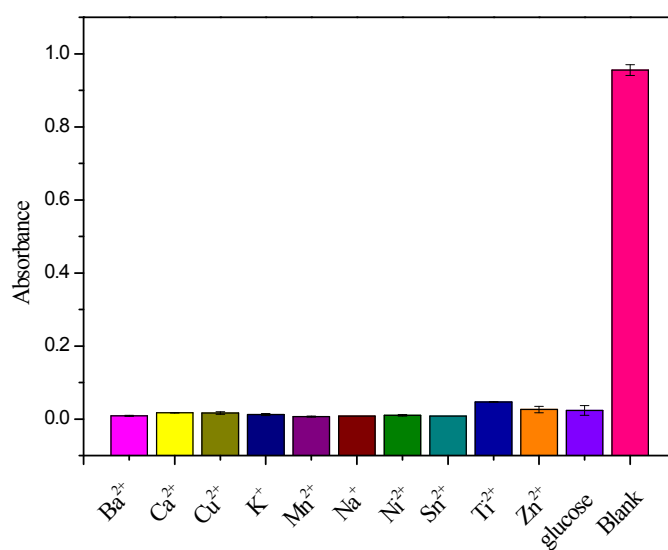

**Fig. s6.** Selectivity analysis for 60 μM of H<sub>2</sub>O<sub>2</sub> replaced by 600 μM of different metal ions and glucose, respectively. The experimental conditions are 200 μL of 0.25 mg mL<sup>-1</sup> Cu-CuFe<sub>2</sub>O<sub>4</sub>, 2.5 mL of HAc-NaAc buffer solution, 250 μL of 10 mM TMB.

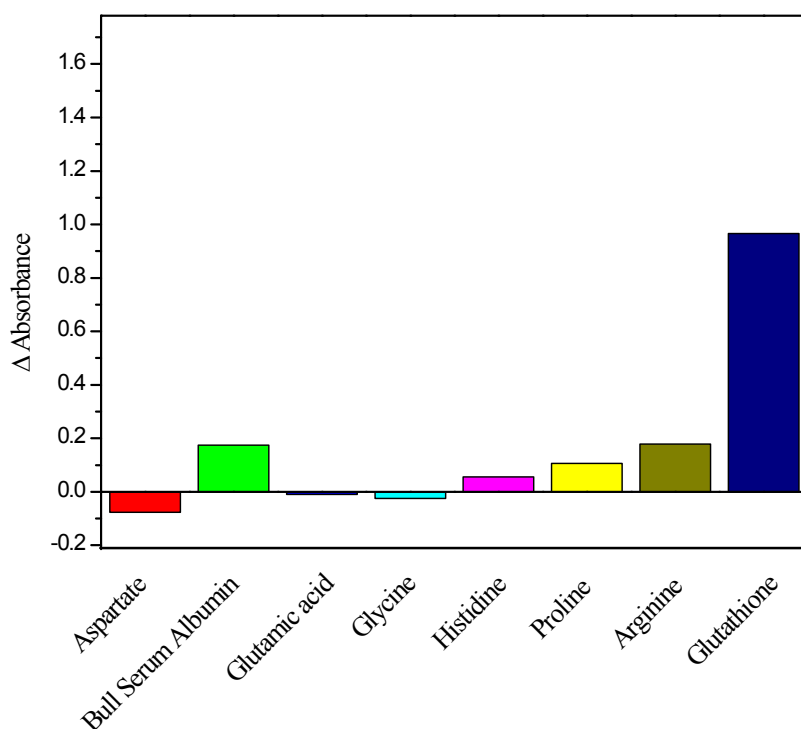

**Fig. s7.** The absorbance of systems contained different biomolecules. (Blank GSH concentration is 90  $\mu\text{M}$  while the other biomolecules concentration is 900  $\mu\text{M}$ ). The experimental conditions are 200  $\mu\text{L}$  of 0.25  $\text{mg mL}^{-1}$  Cu-CuFe<sub>2</sub>O<sub>4</sub>, 2.5 mL of HAc-NaAc buffer solution, 250  $\mu\text{L}$  of 10 mM TMB and 60  $\mu\text{M}$  H<sub>2</sub>O<sub>2</sub>.

**Table s1** Determination of GSH in chicken serums.

| Sample | GSH determination ( $\mu\text{M}$ ) | GSH added ( $\mu\text{M}$ ) | GSH detected ( $\mu\text{M}$ ) | Recovery (%) | RSD (%) |
|--------|-------------------------------------|-----------------------------|--------------------------------|--------------|---------|
| 1      | 66.0                                | 5.00                        | 71.3                           | 106          | 2.17    |
|        |                                     | 10.0                        | 76.3                           | 103          | 2.54    |
|        |                                     | 15.0                        | 80.8                           | 98.7         | 1.67    |
| 2      | 67.5                                | 5.00                        | 72.6                           | 102          | 1.53    |
|        |                                     | 10.0                        | 77.2                           | 97.0         | 2.07    |
|        |                                     | 15.0                        | 82.3                           | 98.7         | 1.32    |
